# Supplementary material for: Preliminary studies of selected Lemna species on the oxygen production potential in relation to some ecological factors
Source: PeerJ. 2024 Jun 17;12:e17322. doi: 10.7717/peerj.17322 (PMC11188931; doi:10.7717/peerj.17322)
Supplement: Data S1 [file peerj-12-17322-s001.xlsx]

## Sheet: base
	O2 %	O2 mg	conductivity	water temp	ambient temp	light	coverage [%]	thickness of Lemna layer [mm]	sediment cover [%]	sediment height [cm]	pressure hPa
Preliminary research:
1: Lemna trisulca
11.02	112	10.2	866	20	23	498	5	15	60	0.4	1018.5
4.04	197	15	588	29.5	24.7	497	10	35	100	0.5	1012.25
5.04	105.5	9	585	22.98	27.4	638	9	36	100	0.5	1000.25
6.04	121.1	10.27	688	23.36	23.8	471	10	35	100	0.5	1003.5
7.04	164	12.54	680	29.26	28.6	1142	15	35	100	0.6	995.75
8.04	149	12.03	652	26.43	24.3	342	15	20	100	0.4	996.25
12.04	154.8	12.72	626	25.2	23.9	492	20	25	100	0.6	1021.75
20.04	80.1	6.92	646	22.67	20.5	1740	25	35	100	0.6	1011
29.04	143.8	11.57	617	26.45	21.7	452	24	45	100	0.7	1026.25
06.05	101.7	9.13	629	20.94	18.5	1175	25	45	100	0.7	1020.75
10.05	141.2	11.61	650	25.88	21.5	373	24	50	100	0.8	1023.75
12.07	76.8	6.54	768	23.22	24.5	675	24	55	100	0.8	1013.5
04.08	121.4	9.65	726	26.91	23.5	682	20	65	100	0.8	1018.25
2: Lemna minor
11.02	99	9.02	736	19.5	23	472	60	7	80	0.09	1018.5
4.04	150	11.4	515	30.4	24.7	523	85	17	85	0.1	1012.25
5.04	85	7.26	548	22.94	26.9	614	90	7	85	0.2	1000.25
6.04	90	7.5	603	23.33	23.3	252	92	12	90	0.4	1003.5
7.04	114.7	8.81	617	28.87	28.5	1063	94	16	98	0.4	995.75
8.04	110.8	8.97	613	26.17	24.4	507	95	12	100	0.5	996.25
12.04	103.3	8.64	574	24.92	23.9	545	96	7	100	0.7	1021.75
20.04	63.3	5.45	581	22.7	21	2750	96	18	100	0.45	1011
29.04	98.4	7.96	568	26.05	21.7	422	97	20	100	0.45	1026.25
06.05	78.8	70.7	573	20.63	18.5	860	95	20	100	0.5	1020.75
10.05	125	10.7	582	25.26	21.5	352	90	19	100	0.5	1023.75
12.07	70.8	6.09	749	22.96	24.4	262	80	20	100	0.6	1013.5
04.08	95.5	7.78	768	26.08	23.5	377	75	15	100	0.5	1018.25
Main experience:
1A: Lemna trisulca / shadow
5.04	75.8	6.2	650	25.4	25.1	389	4	0	0	0	1000.25
6.04	76.2	6.75	653	21.42	24.5	1804	2	0.4	0.1	0	1003.5
7.04	77.8	6.21	650	27.11	29.8	662	3	15	4	0	995.75
8.04	77.8	6.48	643	24.6	24.7	643	3	13	10	0	996.25
12.04	83.9	7.12	598	23.67	24.2	453	3	14	15	0.01	1021.75
20.04	71.8	6.45	485	20.55	21.5	1792	4	40	20	0.1	1011
29.04	84.6	6.9	488	25.94	21	476	4	48	30	0.2	1026.25
06.05	81.2	7.4	475	19.41	18	1307	5	45	35	0.3	1020.75
10.05	88.5	7.09	472	26.69	21.5	1408	5	47	45	0.35	1023.75
12.07	90.7	7.81	243	22.81	24.6	1584	5	45	70	0.4	1013.5
04.08	82.8	6.43	526	28.48	23.5	761	2	50	92	0.4	1018.25
1B: Lemna trisulca / full light
5.04	82.3	6.74	645	26	25	223	4	0	0	0	1000.25
6.04	84.5	7.33	648	22.51	24	938	5	6	0.2	0	1003.5
7.04	77.7	6.15	644	27.77	30.4	2590	4	11	50	0.01	995.75
8.04	81.4	6.69	629	24.98	24.7	386	4	11	52	0.01	996.25
12.04	93	7.82	531	24.29	24	453	5	15	55	0.1	1021.75
20.04	76.5	6.69	409	21.76	21	1910	5	42	55	0.1	1011
29.04	94.4	7.68	417	25.71	21	29.5	5	47	50	0.1	1026.25
06.05	74.3	6.75	408	20.06	18	1116	3	45	52	0.2	1020.75
10.05	92.5	7.54	414	25.84	20.5	376	3	45	55	0.2	1023.75
12.07	81.4	6.97	298	23.19	24.3	793	3	45	60	0.2	1013.5
04.08	90.6	7.21	452	27.32	24	756	4	55	95	0.8	1018.25
2A: Lemna minor / shadow
5.04	72.6	6.3	657	20.7	24	495	2	0.6	0.05	0	1000.25
6.04	79.8	7.08	655	21.53	24.5	1176	3	0.6	0.06	0	1003.5
7.04	80.9	6.38	649	27.57	29.4	2300	3	0.8	5	0	995.75
8.04	75.3	6.21	636	24.61	24.6	542	3	0.8	5	0	996.25
12.04	75.5	6.41	607	23.5	24.3	477	3	1	5	0	1021.75
20.04	76.9	6.9	441	20.67	20.5	1543	4	5	30	0	1011
29.04	80.1	6.49	466	25.94	21.5	491	4	10	40	0.08	1026.25
06.05	79.5	7.3	473	19.53	18.5	1628	5	11	45	0.1	1020.75
10.05	82.3	6.62	483	26.7	21.5	1271	6	11	50	0.1	1023.75
12.07	101.7	8.75	373	22.81	24.8	794	6	11	55	0.1	1013.5
04.08	79.1	6.17	571	28.11	23.5	724	9	11	55	0.1	1018.25
2B: Lemna minor / full light
5.04	75.4	6.18	654	25	26	1118	2	0.5	0	0	1000.25
6.04	78.4	6.81	657	22.45	24.5	779	2	0.8	0.1	0	1003.5
7.04	76.8	6.3	654	27.77	29.6	1853	2	10	5	0.001	995.75
8.04	77.4	6.4	646	24.99	24.7	459	3	5	20	0.001	996.25
12.04	84.3	7.05	591	24.07	24.3	548	3	5	20	0.001	1021.75
20.04	80.9	7.11	443	21.67	21.5	1085	5	20	30	0.001	1011
29.04	85.8	6.97	495	25.83	21.5	341	7	18	30	0.01	1026.25
06.05	76.4	6.94	468	20.2	18	1490	7	15	35	0.09	1020.75
10.05	80.4	6.58	478	25.61	21.5	437	7	12	40	0.09	1023.75
12.07	89.7	7.69	304	22.95	24.7	748	7	10	40	0.1	1013.5
04.08	95.4	7.62	496	27.37	23	726	8	8	50	0.1	1018.25
3A: Lemna trisulca & Lemna minor (mixed) / shadow
5.04	93.7	7.44	492	23.18	25.6	996	5	6	0	0	1000.25
6.04	70.1	5.93	514	23.81	24.5	521	15	6	1	0.1	1003.5
7.04	77.3	6.62	494	23.13	23.6	499	20	6	3	0.1	995.75
8.04	72.7	6.58	480	20.12	21	1861	25	7	5	0.1	996.25
12.04	89.5	7.42	417	20.87	21	375	20	25	25	0.2	1021.75
20.04	81.1	7.52	359	19.09	18	790	20	25	50	0.2	1011
29.04	87.5	7.08	370	20.36	21	881	20	30	55	0.3	1026.25
06.05	78.1	6.31	362	20.28	20.5	1364	15	30	45	0.3	1020.75
10.05	102.3	8.76	229	22.96	23.9	535	20	32	50	0.6	1023.75
12.07	96.4	7.46	473	28.61	24	421	20	35	60	0.6	1013.5
04.08	97.2	7.95	470	23.61	24	578	10	35	60	0.6	1018.25
3B: Lemna trisulca & Lemna minor (mixed) / full light
5.04	79.8	6.47	650	26.4	25	327	5	7	0	0	1000.25
6.04	81.4	7.05	647	22.64	23.3	777	10	10	5	0	1003.5
7.04	87.8	6.93	642	27.95	31.3	2130	10	11	10	0	995.75
8.04	76.9	6.35	631	25.12	24.3	539	15	13	15	0	996.25
12.04	97	8.14	272	24.34	23.4	540	15	14	15	0.1	1021.75
20.04	84.2	7.43	404	21.51	21	1750	15	39	20	0.1	1011
29.04	89.3	7.35	419	25.51	21	369	20	20	20	0.1	1026.25
06.05	80.5	7.38	408	20.02	18	562	20	35	35	0.3	1020.75
10.05	86.4	7.66	412	26.1	21	447	20	40	40	0.5	1023.75
12.07	76.7	6.57	419	23.06	24.6	469	20	50	70	0.6	1013.5
04.08	85.1	6.75	443	27.48	24	788	10	50	70	0.9	1018.25
4A: clean water / control / shadow
5.04	35.8	2.31	656	21	25.9	1360	0	0	0	0	1000.25
6.04	56.5	4.7	649	20	23.4	587	0	0	0	0	1003.5
7.04	68	5.82	601	23	26	1365	0	0	0	0	995.75
8.04	67.1	5.79	635	23.8	24.3	1247	0	0	0	0	996.25
12.04	77.7	6.45	595	22.4	23.7	1020	0	0	0	0	1021.75
20.04	76	6.64	450	20.4	21	1740	0	0	0	0	1011
29.04	77.5	6.9	478	22.3	21	1370	0	0	0	0	1026.25
06.05	73.2	6.73	489	18	20	899	0	0	0	0	1020.75
10.05	75.4	6.27	490	25	21	420	0	0	0	0	1023.75
12.07	80.6	7.23	390	23.3	24.3	569	0	0	0	0	1013.5
04.08	78	7.52	487	24	23	678	0	0	0	0	1018.25
4B: clean water / control / full light
5.04	37.8	2.41	670	21	25.9	1464	0	0	0	0	1000.25
6.04	76.5	6.7	646	21.55	23.4	432	0	0	0	0	1003.5
7.04	88	6.82	606	27.15	30.7	2410	0	0	0	0	995.75
8.04	69.1	5.79	635	24.4	24.3	1459	0	0	0	0	996.25
12.04	79.7	6.75	599	23.37	23.7	1055	0	0	0	0	1021.75
20.04	77	6.94	450	20.43	21	1901	0	0	0	0	1011
29.04	87.7	7.2	481	24.54	21	1457	0	0	0	0	1026.25
06.05	83.2	7.73	489	19.02	18	1237	0	+	0	0	1020.75
10.05	85.4	6.85	491	25.5	21	385	0	+	0	0	1023.75
12.07	95.6	8.23	392	22.78	24.2	559	0	+	0	0	1013.5
04.08	92	7.22	482	26.8	23.5	743	0	+	0	0	1018.25

## Sheet: Arkusz1
PODSUMOWANIE - WYJŚCIE
Statystyki regresji
Wielokrotność R	0.693686
R kwadrat	0.4812
Dopasowany R kwadrat	0.436087
Błąd standardowy	24.3162
Obserwacje	26
ANALIZA WARIANCJI
	df	SS	MS	F	Istotność F
Regresja	2	12613.8	6306.9	10.6665	0.000527835
Resztkowy	23	13599.4	591.279
Razem	25	26213.2
	Współczynniki	Błąd standardowy	t Stat	Wartość-p	Dolne 95%	Górne 95%	Dolne 95.0%	Górne 95.0%
Przecięcie	-105.926	68.2612	-1.55177	0.13437	-247.135	35.2835	-247.135	35.2835
przewod	0.0365945	0.0623878	0.586566	0.563209	-0.0924645	0.165654	-0.0924645	0.165654
temp wody	7.92733	1.75374	4.52023	0.000153906	4.29943	11.5552	4.29943	11.5552
